# Supplementary material
Source: publisher figshare collection journal article supplement (https://karger.figshare.com/articles/dataset/_/4737538)
Supplement: Supplementary file 1 [file 1]

**Appendix Table 2: Baseline characteristics of Medical Therapy Alone prospective studies and single arm of RCTs**

| Author, Year Country PMID                           | Enrollment years   | N    | F/U (y) | % Male | Age (yr)    | Degree of stenosis | Imaging | HTN (%) | Hyperlipidemia (%) | DM (%) | Smoker * (%) | CHD (%) | Prev CEA (%) | >70% stenosis (%)  | Anti-thrombotic (%) | LLT (%)           |
|-----------------------------------------------------|--------------------|------|---------|--------|-------------|--------------------|---------|---------|--------------------|--------|--------------|---------|--------------|--------------------|---------------------|-------------------|
| <b>Medical therapy single arm RCT</b>               |                    |      |         |        |             |                    |         |         |                    |        |              |         |              |                    |                     |                   |
| AbuRahma, 2003, USA <sup>34</sup>                   | 1991-2000 (2 RCTs) | 101  | 3.4     | NR     | NR          | 50-99%             | DUS     | NR      | NR                 | NR     | NR           | NR      | 100          | 36 <sup>##</sup>   | NR                  | NR                |
| ACAS, 1995, USA <sup>28</sup>                       | 1987-1993          | 834  | 5.25    | 66     | 67          | 60-99%             | DUS     | 64      |                    | 21     | 24           | 69      | 19           | 29                 | 100                 | Y; NR on coverage |
| ACST, 2004, 2010, Europe <sup>29-30</sup>           | 1993-2003          | 1560 | 4.4     | 66     | 68          | 60-99%             | DUS     | 65      | NR                 | NR     | NR           | NR      | 24           | NR                 | 100                 | 82                |
| ECST, 1995, Europe <sup>26</sup>                    | Before 1992        | 127  | 3.5     | 71     | 64          | 70-99%             | DSA     | NR      | NR                 | 14.2   | 50           | 33      | 0            | 100                | 100                 | NR                |
| Hobson, 1993, (VA) USA <sup>31</sup>                | 1983-1987          | 233  | 9       | 100    | 64.7        | 50-99%             | DUS DSA | 64      | NR                 | NR     | 91           | 25      | 0            | NR                 | 84                  | NR                |
| Inzitari 2000; Anderson, 2002, USA <sup>32-33</sup> | 1988-1997          | 324  | 2.4     | 68     | 66          | 50-99%             | DSA     | 60      | 32                 | 22     | 33           | 36      | ~50%         | 32                 | 95                  | NR                |
| <b>Prospective Cohort Studies</b>                   |                    |      |         |        |             |                    |         |         |                    |        |              |         |              |                    |                     |                   |
| Abbott, 2005, Australia <sup>27</sup>               | 1996-2000          | 202  | 3       | 68     | 74          | 60-99%             | DUS     | 72      | 67                 | 17     | 14           | 52      | 0            | 49                 | 93                  | 75                |
| AbuRahma, 2003, USA <sup>35</sup>                   | NR                 | 82   | 5       | 55     | 66          | 60-69%             | DUS     | 71      | 49                 | 38     | 59           | 46      | 0            | 0                  | 100                 | NR                |
| Aichner, 2009, Austria <sup>36</sup>                | NR                 | 3164 | 3.2     | 64     | 71          | 70-99%             | DUS DSA | 87      | 74.2               | 37.1   | 18.5         | 54.8    | 0            | 100                | 90                  | 71                |
| Ballotta, 2007, Italy <sup>37</sup>                 | 1995-2004          | 98   | 2.7     | 62.1   | 71          | 50-69%             | DUS DSA | 57.1    | 43.1               | 33     | 67.6         | 44.6    | 100          | 0                  | 100                 | NR                |
| Bock, 1993, Australia <sup>38</sup>                 | 1985-1991          | 74   | 1       | 78     | 68.1        | 50-99%             | DUS     | 59      | NR                 | 23     | 35           | 57      | 0            | 13.7 <sup>##</sup> | 27                  | NR                |
| Bogousslavsky, 1986, Switzerland <sup>39</sup>      | 1980-1984          | 38   | 4.1     | 55     | 60          | 90-99%             | DUS     | 52.6    | NR                 | 21.1   | 73.7         | 79      | 0            | 100                | 100                 | 0                 |
| CASANOVA, 1991, Germany <sup>40</sup>               | 1982-1988          | 111  | 6       | 82.5   | 64.1        | 50-90%             | DUS DSA | 62      | 52                 | 33     | 24           | 42      | 26           | 54                 | 100                 | NR                |
| Dick, 2005, Austria <sup>41</sup>                   | 1997-2002          | 525  | 4       | 62     | 73 (median) | 70-99%             | DUS     | 75      | 76                 | 34     | 19           | 43      | 0            | 100                | 37                  | 62                |
| Ellis, 1992, UK <sup>42</sup>                       | 1985-1989          | 164  | 3.2     | NR     | NR          | 50-99%             | DUS     | NR      | NR                 | NR     | NR           | NR      | NR           | NR                 | NR                  | NR                |
| Goessens, 2007, Netherlands <sup>43</sup>           | 1996               | 221  | 4.5     | 73     | 64.5        | 50-99%             | DUS     | NR      | NR                 | 21     | 90           | 59      | 0            | NR                 | 63                  | 45                |
| Gronholdt, 2001, Denmark <sup>44</sup>              | 1994-1996          | 111  | 4       | 53     | 64          | 50-99%             | DUS     | 38      | NR                 | 9      | 56           | NR      | 0            | 27 <sup>##</sup>   | NR                  | NR                |
| Gur, 1996, Israel <sup>45</sup>                     | 1995               | 44   | 3.6     | 50     | 69          | 70-99%             | DUS DSA | 66      | 23                 | 41     | 25           | NR      | NR           | 100                | 100                 | NR                |
| Hennerici, 1987, Germany <sup>46</sup>              | 1978-1985          | 235  | 2       | 59     | 61.8        | 50-99%             | DUS     | 54      | 38                 | 23     | NR           | 81      | 0            | 15 <sup>##</sup>   | 31                  | 0                 |
| Johnson, 1985, USA <sup>47</sup>                    | 1981-1984          | 121  | 4       | NR     | NR          | 75-99%             | NR      | NR      | NR                 | NR     | NR           | NR      | 0            | 100                | 0                   | NR                |
| Johnson, 1995, USA <sup>48</sup>                    | NR                 | 94   | 2.9     | 62     | NR          | 50-79%             | DUS     | NR      | NR                 | NR     | NR           | NR      | 0            | NR                 | NR                  | NR                |
| Langsfeld, 1989, Australia <sup>49</sup>            | 1983-1987          | 225  | 7       | 83     | 66.5        | 50-99%             | DUS     | 51      | NR                 | NR     | 81           | 41      | 100          | 1.3 <sup>###</sup> | NR                  | NR                |
| Levien, 1984, South Africa <sup>50</sup>            | 1984               | 50   | 3       | NR     | NR          | NR                 | DUS     | NR      | NR                 | NR     | NR           | NR      | 0            | NR                 | NR                  | NR                |
| Liapis, 2001, Greece <sup>51</sup>                  | 1988-1997          | 136  | 1.8     | NR     | NR          | NR                 | DUS     | NR      | NR                 | NR     | NR           | NR      | 0            | 31.6               | NR                  | NR                |
| Longstreth, 1998, USA <sup>52</sup>                 | NR                 | 184  | 1.5     | NR     | 73          | 50-99%             | DUS     | NR      | NR                 | NR     | NR           | NR      | 0            | 27                 | NR                  | NR                |

| Author, Year Country PMID                          | Enrollment years | N    | F/U (y) | % Male | Age (yr) | Degree of stenosis | Imaging | HTN (%) | Hyperlipidemia (%) | DM (%) | Smoker * (%) | CHD (%) | Prev CEA (%) | >70% stenosis (%) | Anti-thrombotic (%) | LLT (%) |
|----------------------------------------------------|------------------|------|---------|--------|----------|--------------------|---------|---------|--------------------|--------|--------------|---------|--------------|-------------------|---------------------|---------|
| Mackey, 1997, Canada <sup>#53</sup>                | 1988-1994        | 357  | 3.7     | 40     | 65       | 50-99%             | DUS     | 47      | 50                 | 20     | 35           | 39      | 0            | 42 <sup>##</sup>  | NR                  | NR      |
| Mansour, 1999, USA <sup>54</sup>                   | 1992-1996        | 344  | 5       | 100    | 70.6     | 50-79%             | DUS     | 78      | 27                 | 36     | 67           | 61      | 0            | NR                | 62                  | NR      |
| Markus, 2010, International <sup>55</sup>          | NR               | 467  | 3.1     | 74     | 71.5     | 70-99%             | DUS     | 90      | NR                 | 21     | 61           | 36.9    | NR ^         | 40 <sup>##</sup>  | 95.9                | 64      |
| Marquardt, 2010, UK <sup>56</sup>                  | 2002-2009        | 101  | 2.1     | 61     | 71.5     | 50-99%             | DUS     | 68      | NR                 | 16     | 75           | 14      | NR           | 32                | 96                  | 88      |
| Mayo, 1992, USA <sup>57</sup>                      | ~1990            | 90   | 2       | 57.3   | NR       | 50-99%             | DUS DSA | 72      | 62                 | 18     | 73.5         | 40      | 0            | NR                | 100                 | NR      |
| Nicolaides 2005; Kakkos, 2005, UK <sup>58-59</sup> | NR               | 805  | 3       | 61     | 70       | 50-99%             | DUS     | 63      | 60                 | 21     | 71           | 34      | 0            | 56                | 84                  | 25      |
| Norris, 1991, Canada <sup>60</sup>                 | NR               | 393  | 2       | 54     | 65.6     | 50-100%            | DUS     | 50      | 30                 | 15     | 77           | 37      | NR           | 45 <sup>###</sup> | 54                  | NR      |
| Sabeti, 2007, Austria <sup>#61</sup>               | 2002-2003        | 613  | 3.1     | 63     | 71.8     | 50-99%             | DUS     | 72      | 73                 | 24.5   | 27           | 43      | NR           | NR                | 56                  | 59      |
| Satiani, 1990, USA <sup>#62</sup>                  | NR               | 57   | 3.2     | 44     | 67.6     | 50-99%             | DUS DSA | 49      | NR                 | 24     | 56           | 54      | 0            | 27 <sup>##</sup>  | NR                  | NR      |
| Satiani, 1993, USA <sup>#63</sup>                  | NR               | 127  | 3.4     | 50     | 67.5     | 50-99%             | DUS     | NR      | NR                 | NR     | NR           | NR      | 100          | 0.4 <sup>##</sup> | NR                  | NR      |
| Siebler, 1995, Germany <sup>64</sup>               | NR               | 64   | 3.6     | 75     | 65.5     | 70-90%             | DUS     | 60.9    | NR                 | 17.2   | 57.8         | 46.9    | 0            | 100               | 78.2                |         |
| Silvestrini, 2000, Italy <sup>65</sup>             | 1996-1998        | 94   | 2       | 79     | 71       | 70-90%             | DUS     | 70      | 32                 | 30     | 37           | NR      | 0            | 100               | 100                 | 32      |
| Spence, 2005, 2010, Canada <sup>66-67</sup>        | 2000-2007        | 468  | 1.4     | 57.8   | 69.8     | 60-99%             | DUS     | 75.4    | 50.8               | 18.6   | 18.1         | 33.2    | NR           | NR                | 81                  | 13.6    |
| Takahashi, 2006, Japan <sup>68</sup>               | 1994-2001        | 2924 | 2.3     | 65     | 55       | 50-99%             | DUS     | 12      | 5                  | 3      | NR           | NR      | NR           | NR                | 0                   | 5       |
| Takaya, 2006, USA <sup>69</sup>                    | NR               | 154  | 2       | 82     | 71.1     | 50-79%             | DUS     | 75      | 79                 | 25     | 87           | 44      | NR           | NR                | NR                  | 64      |
| Zhang, 2009, China <sup>70</sup>                   | NR               | 62   | 1       | NR     | 65.5     | 50-99%             | DUS     | NR      | NR                 | NR     | NR           | NR      | NR           | 30.6              | NR                  | NR      |

\* Current or past smoker

# Baseline values are for the overall population sample from which patients with >50% stenosis were selected

## ≥ 80% stenosis

### ≥ 75% stenosis

^ The population included patients who had undergone CEA for the contralateral artery, but their number or proportion was not known

f/u = followup; HTN = hypertension; DM = diabetes mellitus; CHD = coronary heart disease; PVD = peripheral vascular disease; CEA = carotid endarterectomy; LLT = lipid lowering therapy, including statins; NR = not reported; DUS = Doppler ultrasound; DSA = Digital subtraction angiography.
