# Supplementary material
Source: publisher figshare collection journal article supplement (https://karger.figshare.com/articles/dataset/_/4737538)
Supplement: Supplementary file 2 [file 1]

**Appendix Table 1: Search strategy**

| #   | Terms                                                                                                                                                                            |
|-----|----------------------------------------------------------------------------------------------------------------------------------------------------------------------------------|
| 1.  | exp cohort studies/ or exp prospective studies/ or exp retrospective studies/ or exp epidemiologic studies/ or exp case-control studies/                                         |
| 2.  | (cohort or retrospective or prospective or longitudinal or observational or follow-up or followup or registry).af.                                                               |
| 3.  | case-control.af. or (case adj10 control).tw.                                                                                                                                     |
| 4.  | ep.fs.                                                                                                                                                                           |
| 5.  | randomized controlled trial.pt.                                                                                                                                                  |
| 6.  | controlled clinical trial.pt.                                                                                                                                                    |
| 7.  | randomized controlled trials/                                                                                                                                                    |
| 8.  | Random Allocation/                                                                                                                                                               |
| 9.  | Double-blind Method/                                                                                                                                                             |
| 10. | Single-Blind Method/                                                                                                                                                             |
| 11. | clinical trial.pt.                                                                                                                                                               |
| 12. | Clinical Trials.mp. or exp Clinical Trials/                                                                                                                                      |
| 13. | (clinic\$ adj25 trial\$).tw.                                                                                                                                                     |
| 14. | ((singl\$ or doubl\$ or trebl\$ or tripl\$) adj (mask\$ or blind\$)).tw.                                                                                                         |
| 15. | Placebos/                                                                                                                                                                        |
| 16. | placebo\$.tw.                                                                                                                                                                    |
| 17. | random\$.tw.                                                                                                                                                                     |
| 18. | trial\$.tw.                                                                                                                                                                      |
| 19. | (randomized control trial or clinical control trial).sd.                                                                                                                         |
| 20. | (latin adj square).tw.                                                                                                                                                           |
| 21. | Comparative Study.tw. or Comparative Study.pt.                                                                                                                                   |
| 22. | exp Evaluation studies/                                                                                                                                                          |
| 23. | Follow-Up Studies/                                                                                                                                                               |
| 24. | Prospective Studies/                                                                                                                                                             |
| 25. | (control\$ or prospectiv\$ or volunteer\$).tw.                                                                                                                                   |
| 26. | Cross-Over Studies/                                                                                                                                                              |
| 27. | or/5-26                                                                                                                                                                          |
| 28. | carotid artery diseases/ or carotid artery thrombosis/ or carotid stenosis.mp. [mp=ti, ot, ab, nm, hw, ui, sh, kw]                                                               |
| 29. | carotid arteries/ or carotid artery, common/ or carotid artery, external/ or carotid artery, internal/                                                                           |
| 30. | constriction, pathologic/                                                                                                                                                        |
| 31. | 29 and 30                                                                                                                                                                        |
| 32. | (carotid adj5 (stenosis or thrombo\$ or disease\$ or narrow\$ or plaque\$ or arterioscler\$ or atheroscler\$ or narrowing\$ or bruit or asymptomatic or silent or lesion\$)).tw. |
| 33. | 28 or 31 or 32                                                                                                                                                                   |
| 34. | angioplasty/ or angioplasty, balloon/ or angioplasty, balloon, laser-assisted/                                                                                                   |
| 35. | Balloon Dilatation/                                                                                                                                                              |
| 36. | Stents/                                                                                                                                                                          |
| 37. | (angioplasty or stent\$ or endovascular).tw.                                                                                                                                     |
| 38. | (balloon adj5 (dilat\$ or catheter\$)).tw.                                                                                                                                       |
| 39. | ((endoluminal or transluminal or percutaneous) adj5 (repair\$ or intervention)).tw.                                                                                              |
| 40. | 34 or 35 or 36 or 37 or 38 or 39                                                                                                                                                 |
| 41. | endarterectomy/                                                                                                                                                                  |
| 42. | endarterectomy, carotid/                                                                                                                                                         |
| 43. | (carotid adj5 endarterectomy).tw.                                                                                                                                                |
| 44. | 1 or 2 or 3 or 4                                                                                                                                                                 |
| 45. | 33 and 44                                                                                                                                                                        |
| 46. | limit 45 to yr="2008 -Current"                                                                                                                                                   |

|     |                           |
|-----|---------------------------|
| 47. | remove duplicates from 46 |
| 48. | 41 or 42 or 43            |
| 49. | 40 or 48                  |
| 50. | 33 and 49                 |
| 51. | 27 and 50                 |
| 52. | remove duplicates from 51 |
| 53. | 47 or 52                  |

\* Citations published before 2008 for medical therapy alone were identified by contacting author of the following study: Abbott, A.L., Medical (nonsurgical) intervention alone is now best for prevention of stroke associated with asymptomatic severe carotid stenosis: results of a systematic review and analysis. Stroke. 2009;40:e573-e583.
